# Supplementary material for: Effects of hesperidin combined with synephrine on the capture of acrolein in a mouse model, or in humans by citrus consumption
Source: Royal Society of Chemistry journal article supplement (doi:10.1039/d2fo03522g), 2023-01-01

**Supplementary Material**

**Effects of hesperidin combined with synephrine on the  
capture of acrolein in mouse model, or human by citrus  
consumption**

Mengwei Jia, Huihui Gu, Yongling Lu, Lishuang Lv\*

Department of Food Science and Technology, School of Food Science and  
Pharmaceutical Engineering, Nanjing Normal University, 2 Xuelin Road, Nanjing,  
Jiangsu 210023, People's Republic of China

Corresponding author (Dr. Lishuang Lv, Telephone/Fax: +86 25-85898183; E-mail:

lishuanglv@126.com or lulishuang@njnu.edu.cn

**Figure Legends:**

**Fig. S1.** Representative UPLC–MS/MS data of the ACR adducts of SYN, HES, and its metabolite HESP in urine samples collected from human volunteers before and after citrus consumption.

**Fig. S2.** Representative UPLC–MS/MS data of the ACR adducts of HES and its metabolite HESP in fecal samples collected from human volunteers before and after citrus consumption.

Fig. S1.

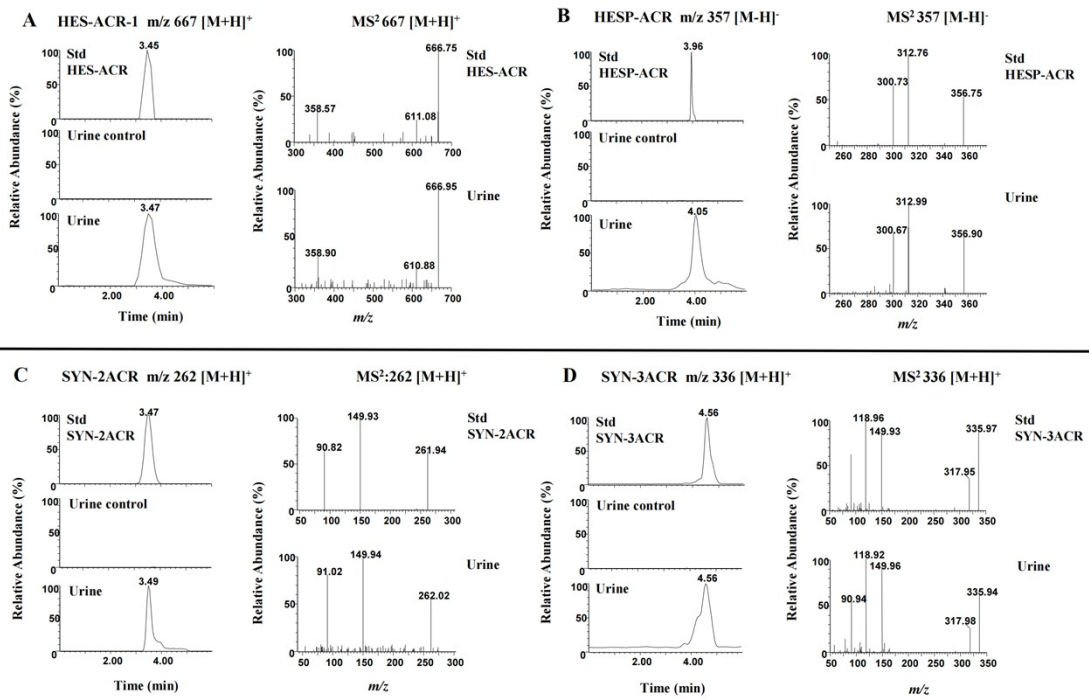

Fig. S2.

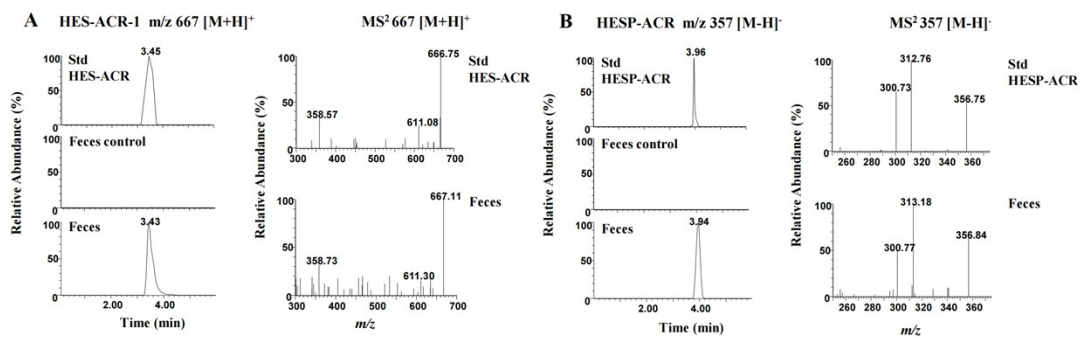

Supplement: d2fo03522g1.pdf [file d2fo03522g1.pdf]
